# Supplementary material for: Decay of velvet worms (Onychophora), and bias in the fossil record of lobopodians
Source: PubMed Central journal article supplement (PMC4266977; doi:10.1186/s12862-014-0222-z), 2014-11-29

Last pristine

First decaying

Last decaying

Lost

Body wall musculature

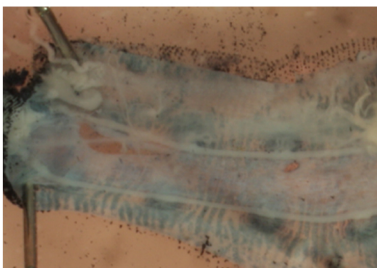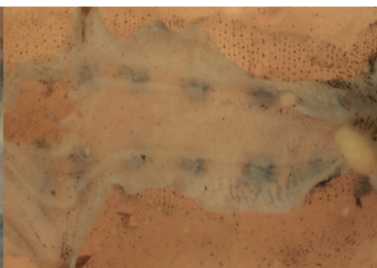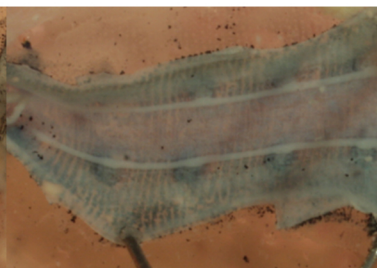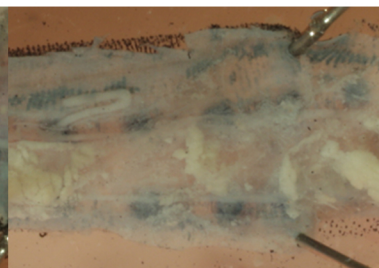

Slime glands

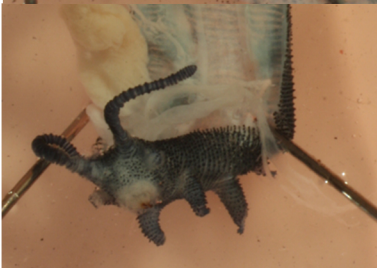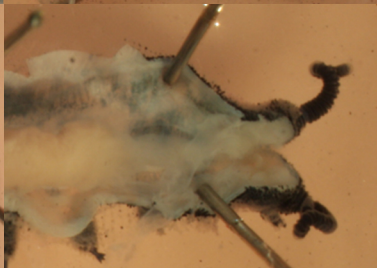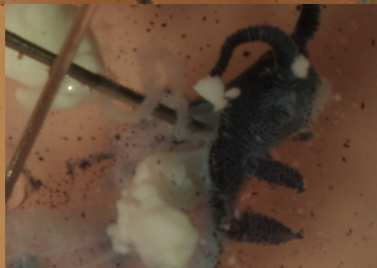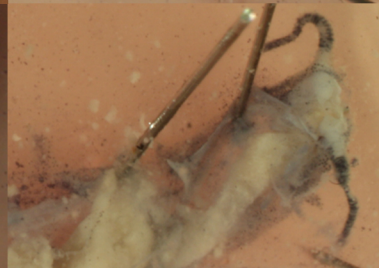

Gonads

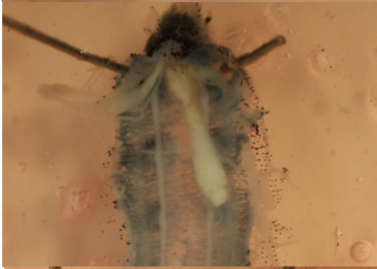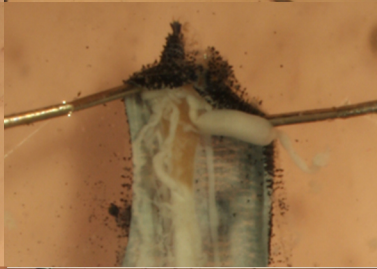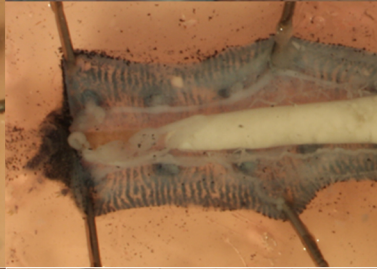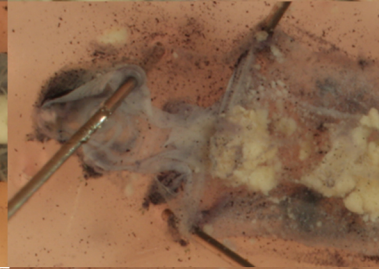

Nerve cords

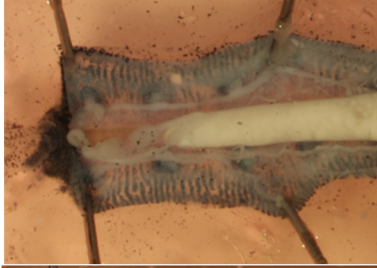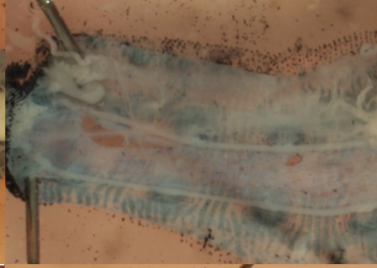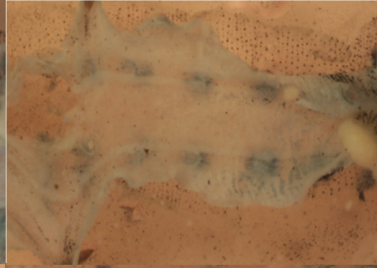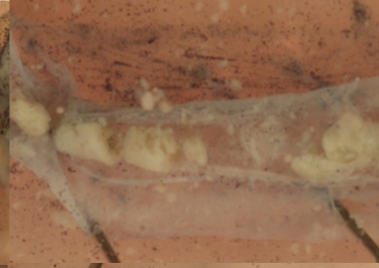

Gut

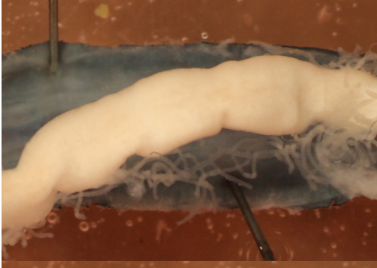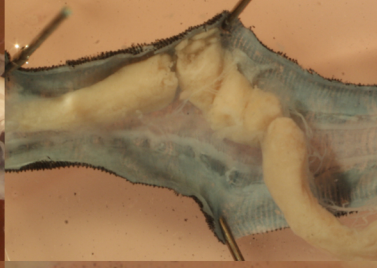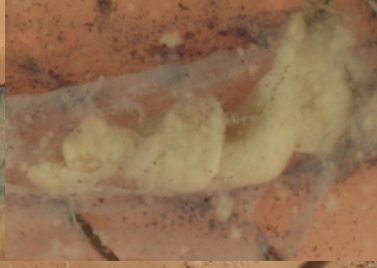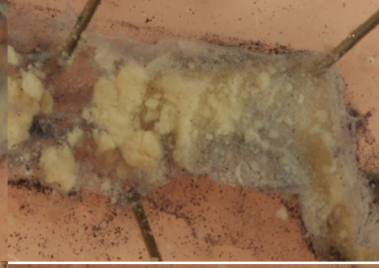

Epidermis

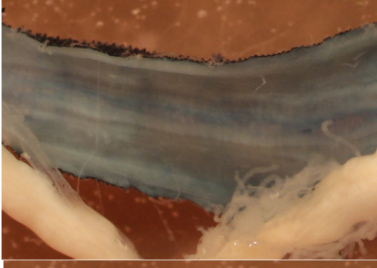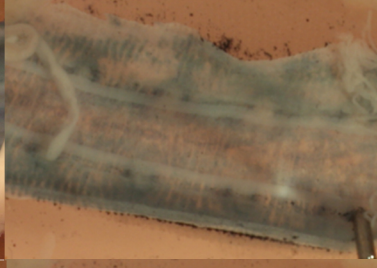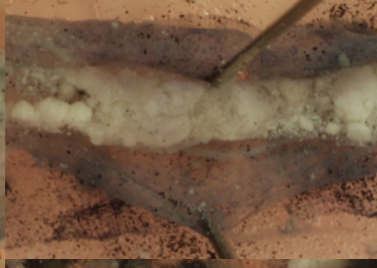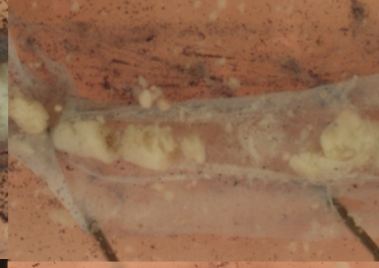

Pigment granules

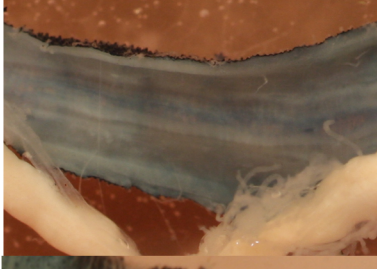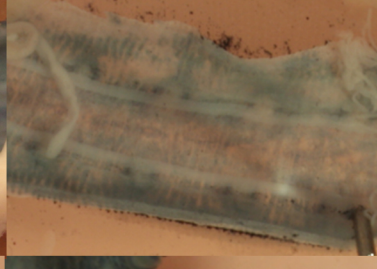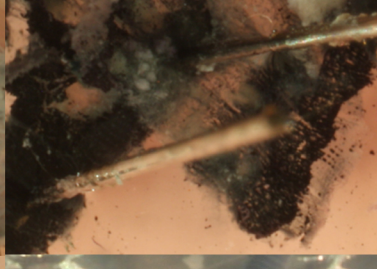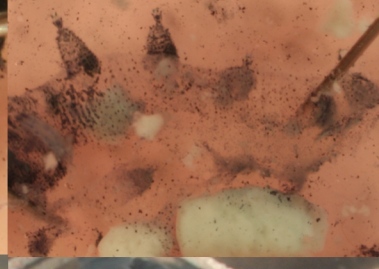

Mouth (with tongue)

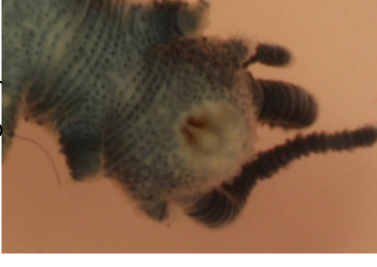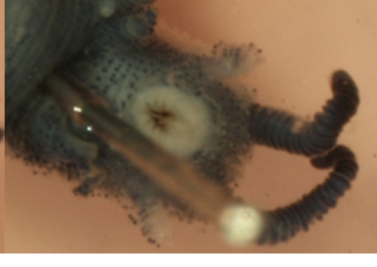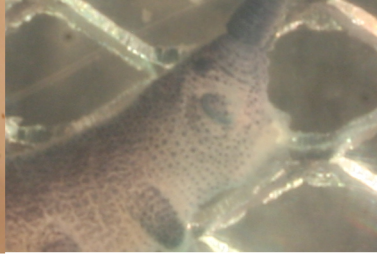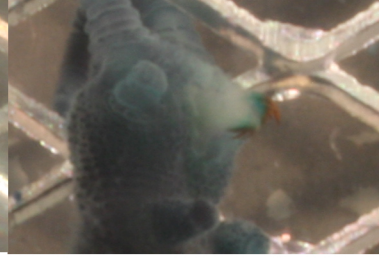

Supplement: 12862_2014_222_MOESM3_ESM.pdf [file 12862_2014_222_MOESM3_ESM.pdf]
