# Supplementary material for: Decay of velvet worms (Onychophora), and bias in the fossil record of lobopodians
Source: PubMed Central journal article supplement (PMC4266977; doi:10.1186/s12862-014-0222-z), 2014-11-29

Proportion of decay through experiment

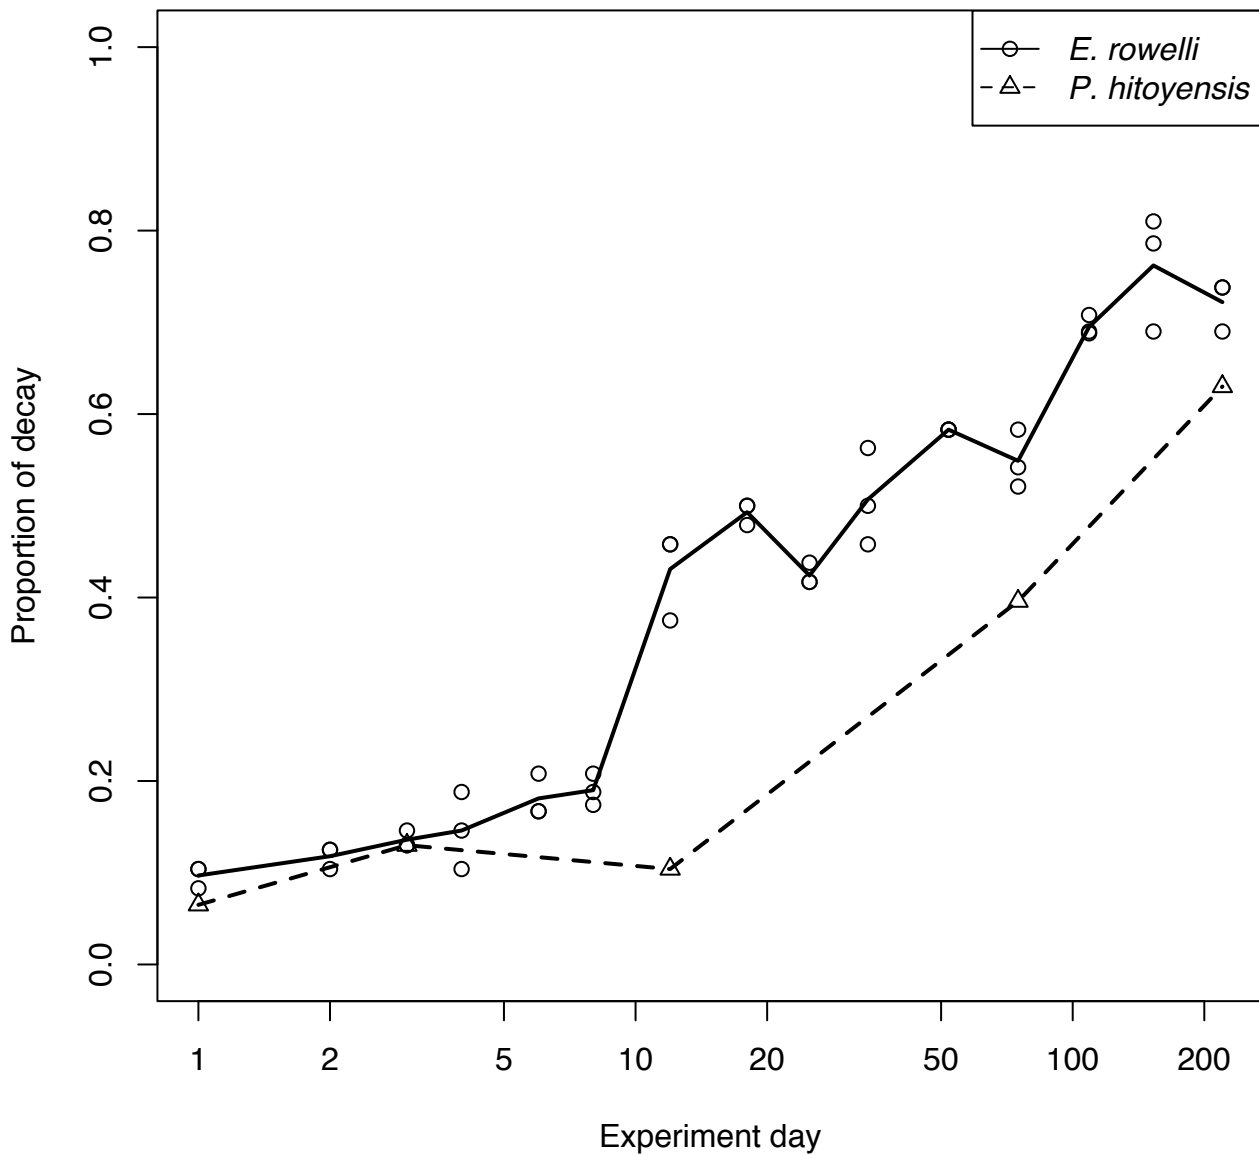

Supplement: 12862_2014_222_MOESM1_ESM.pdf [file 12862_2014_222_MOESM1_ESM.pdf]
