# Supplementary material for: Decay of velvet worms (Onychophora), and bias in the fossil record of lobopodians
Source: PubMed Central journal article supplement (PMC4266977; doi:10.1186/s12862-014-0222-z), 2014-11-29
Supplement: 12862_2014_222_MOESM8_ESM.pdf [file 12862_2014_222_MOESM8_ESM.pdf]

**Additional file 8: Character transformation and loss throughout decay experiments  
in the onychophoran *Euperipatoides rowelli*.**

|                           | <b>‘Pristine’<br/>condition</b>                                                                        | <b>‘Decaying’<br/>condition</b>                                                       | <b>‘Lost’ condition</b>                       |
|---------------------------|--------------------------------------------------------------------------------------------------------|---------------------------------------------------------------------------------------|-----------------------------------------------|
| <i>Overall morphology</i> |                                                                                                        |                                                                                       |                                               |
| Integrity of cuticle      | All layers intact                                                                                      | Breakdown of procuticle and separation of outer cuticle and procuticle from epidermis | Rupture of outer cuticle, and fibrous texture |
| Anterior                  | Morphology faithfully replicated by all layers of cuticle (but allowing for some detachment of layers) | Morphology only visible in outer cuticle                                              | Individual structures indistinct              |
| Limbs                     | Morphology faithfully replicated by all layers of cuticle (but allowing for some detachment of layers) | Clear deformation of limb and complete detachment of foot base                        | Limbs indistinguishable                       |
| Posterior                 | Morphology faithfully replicated by all layers of cuticle (but allowing for some detachment of layers) | Morphology only visible in outer cuticle                                              | Individual structures indistinct              |
| <i>Head structures</i>    |                                                                                                        |                                                                                       |                                               |
| Antennae                  | As at death, but allows for some whitening, and curling                                                | Morphology only distinct in outer cuticle                                             | No longer identifiable                        |
| Slime papillae            | As at death, but allows for some whitening, and shape change                                           | Morphology only distinct in outer cuticle                                             | No longer identifiable                        |
| Jaws                      | As at death, but allows for relative movement of elements                                              | Stage not reached during experiment                                                   | Stage not reached during experiment           |
| Mouth (with               | As at death but                                                                                        | Swelling of tongue                                                                    | Only identifiable                             |

|                          |                                                                                                |                                                                                  |                                                                    |
|--------------------------|------------------------------------------------------------------------------------------------|----------------------------------------------------------------------------------|--------------------------------------------------------------------|
| tongue)                  | allows for whitening and detachment of surrounding cuticle                                     |                                                                                  | by the presence of jaws                                            |
| Eyes                     | Clearly visible dark eye spots                                                                 | Reduction in darkness of pigment and loss of distinct outline                    | No longer visible                                                  |
| <i>Trunk structures</i>  |                                                                                                |                                                                                  |                                                                    |
| Dermal papillae          | As at death, but allows for whitening and some shape distortion associated with cuticle decay  | Some lost or indistinct, significant swelling and distortion                     | Effacement of trunk                                                |
| Pigment                  | Pigment contained within pigment granules, strong dark-blue coloration                         | Pigment granules disturbed or burst, lightening of dorsum, venter becomes pinker | Complete loss of blue coloration and break-up of distinct granules |
| Trunk annuli (plicae)    | As at death, but allowing for kinking associated with whole body deformation                   | Annuli become wavy and/or indistinct                                             | Effacement of trunk                                                |
| <i>Limbs</i>             |                                                                                                |                                                                                  |                                                                    |
| Transverse leg rings     | As at death, but allowing for kinking associated with whole limb deformation                   | Leg rings become wavy and/or indistinct                                          | Effacement of limbs                                                |
| Dermal papillae on limbs | As at death, but allows for whitening and some shape distortion associated with cuticle decay  | Some lost or indistinct, significant swelling and distortion                     | Effacement of limbs                                                |
| Foot claws               | As at death, but allows for relative movement of elements                                      | Stage not reached during experiment                                              | Stage not reached during experiment                                |
| Feet                     | Morphology faithfully replicated by all layers of cuticle (but allowing for some detachment of | Morphology only visible in outer cuticle                                         | No longer identifiable                                             |

|                              |                                                                                                        |                                                                                      |                                                                                       |
|------------------------------|--------------------------------------------------------------------------------------------------------|--------------------------------------------------------------------------------------|---------------------------------------------------------------------------------------|
|                              | layers)                                                                                                |                                                                                      |                                                                                       |
| <i>Posterior body region</i> |                                                                                                        |                                                                                      |                                                                                       |
| Anus                         | Morphology faithfully replicated by all layers of cuticle (but allowing for some detachment of layers) | Morphology only visible in outer cuticle                                             | No longer identifiable                                                                |
| Gonopore                     | Morphology faithfully replicated by all layers of cuticle (but allowing for some detachment of layers) | Morphology only visible in outer cuticle                                             | No longer identifiable                                                                |
| <i>Internal anatomy</i>      |                                                                                                        |                                                                                      |                                                                                       |
| Epidermis                    | Thick white layer attached to procuticle and outer cuticle                                             | Detached from procuticle and outer cuticle, thinned, but still forms distinct cavity | Too thin to identify and/or collapsed onto and indistinguishable from internal organs |
| Slime glands                 | As at death                                                                                            | Disaggregated, loss of endpieces                                                     | No longer identifiable, part of white mass                                            |
| Gut                          | As at death                                                                                            | Soapy and easily disaggregated                                                       | No longer identifiable, part of white mass                                            |
| Gonads                       | As at death                                                                                            | Indistinct outline, disaggregated                                                    | No longer identifiable, part of white mass                                            |
| Nerve cords                  | Clear paired structures                                                                                | Visible but indistinct                                                               | No longer visible                                                                     |
| Body wall musculature        | As at death                                                                                            | Visible but indistinct                                                               | No longer visible                                                                     |
