# Supplementary material for: Decay of velvet worms (Onychophora), and bias in the fossil record of lobopodians
Source: PubMed Central journal article supplement (PMC4266977; doi:10.1186/s12862-014-0222-z), 2014-11-29
Supplement: 12862_2014_222_MOESM9_ESM.pdf [file 12862_2014_222_MOESM9_ESM.pdf]

**Additional file 9: Phylogenetic distribution of characters among panarthropods and cycloneuralians.**

|                           | <b>Character in Onychophora</b>                                                            | <b>Comparison with Arthropoda</b>                                             | <b>Comparison with Tardigrada</b>             | <b>Comparison with Cycloneuralia</b>      |
|---------------------------|--------------------------------------------------------------------------------------------|-------------------------------------------------------------------------------|-----------------------------------------------|-------------------------------------------|
| <i>Overall morphology</i> |                                                                                            |                                                                               |                                               |                                           |
| Integrity of cuticle      | Decay resistant integument or cuticle                                                      | Homologue                                                                     | Homologue                                     | Homologue                                 |
| Anterior                  | Differentiated region in front of anterior-most walking legs                               | Nature of the homology unclear                                                | Nature of the homology unclear                | -                                         |
| Limbs                     | Lobose walking limbs                                                                       | Homologue – arthropodized limbs derived                                       | Homologue                                     | -                                         |
| Posterior                 | Differentiated region behind of posterior-most limbs                                       | Homologue                                                                     | Absent in modern forms, possible plesiomorphy | -                                         |
| <i>Head structures</i>    |                                                                                            |                                                                               |                                               |                                           |
| Antennae                  | Autapomorphy, possibly homologous to arthropod labrum                                      | Analogous structure                                                           | -                                             | -                                         |
| Slime papillae            | Autapomorphy                                                                               | -                                                                             | -                                             | -                                         |
| Jaws                      | Autapomorphy                                                                               | -                                                                             | -                                             | -                                         |
| Mouth (with tongue)       | Ventral mouth                                                                              | Analogous ventral mouth                                                       | Sub-terminal mouth                            | Analogous terminal mouth                  |
| Eyes                      | Ocellus-like eyes                                                                          | Likely homologous with the median ocelli, but not compound eyes <sup>17</sup> | Homology disputed – eye spots                 | -                                         |
| <i>Trunk structures</i>   |                                                                                            |                                                                               |                                               |                                           |
| Dermal papillae           | Autapomorphy or possible plesiomorphy (homologous to “tubercles” of e.g. <i>Aysheaia</i> ) | -                                                                             | -                                             | -                                         |
| Pigment                   | Autapomorphy                                                                               | Analogous pigments not housed in granules                                     | Analogous pigments not housed in granules     | Analogous pigments not housed in granules |

|                              |                                                                                                                                    |                                                            |                                                            |                       |
|------------------------------|------------------------------------------------------------------------------------------------------------------------------------|------------------------------------------------------------|------------------------------------------------------------|-----------------------|
| Trunk annuli (dermal plicae) | Autapomorphy                                                                                                                       | -                                                          | -                                                          | -                     |
| <i>Limbs</i>                 |                                                                                                                                    |                                                            |                                                            |                       |
| Transverse leg rings         | Autapomorphy, possible plesiomorphy (cf. annulations of limbs of e.g. <i>Onychodictyon ferox</i> and <i>Aysheaia pedunculata</i> ) | -                                                          | -                                                          | -                     |
| Dermal papillae on limbs     | Autapomorphy, possible plesiomorphy (cf. limbs of <i>Orstenotubulus evamuelleriae</i> )                                            | -                                                          | -                                                          | -                     |
| Foot claws                   | Two claws per limb                                                                                                                 | -                                                          | Multiple claws                                             | -                     |
| Feet                         | Autapomorphy                                                                                                                       | -                                                          | -                                                          | -                     |
| <i>Posterior body region</i> |                                                                                                                                    |                                                            |                                                            |                       |
| Anus                         | Present                                                                                                                            | Homologue                                                  | Homologue                                                  | Homologue             |
| Gonopore                     | Present                                                                                                                            | Homologue                                                  | Homologue                                                  | Homologue             |
| <i>Internal anatomy</i>      |                                                                                                                                    |                                                            |                                                            |                       |
| Epidermis                    | Present                                                                                                                            | Homologue                                                  | Homologue                                                  | Homologue             |
| Slime glands                 | Autapomorphy                                                                                                                       | -                                                          | -                                                          | -                     |
| Gut                          | Symplesiomorphy                                                                                                                    | Homologue                                                  | Homologue                                                  | Homologue             |
| Gonads                       | Symplesiomorphy                                                                                                                    | Homologue                                                  | Homologue                                                  | Homologue             |
| Nerve cords                  | Ventral nerve cords                                                                                                                | Ventral chain of ganglia linked by somata-free connectives | Ventral chain of ganglia linked by somata-free connectives | Analogous nerve cords |
| Body wall musculature        | Symplesiomorphy                                                                                                                    | Homologue                                                  | Homologue                                                  | Homologue             |
